# Supplementary material
Source: MDPI journal article supplement (https://www.mdpi.com/2311-5637/9/12/1016)
Supplement: s1 [file s1 › fermentation-2675868-supplementary.pdf]

# Supporting Information

**Shujing Zhang, Hui Sun, Zhiqi Huang, Zhuoxuan Han, Jiayi Hou, Fuping Lu and Yihan Liu \***

Key Laboratory of Industrial Fermentation Microbiology, Ministry of Education,  
Tianjin Key Laboratory of Industrial Microbiology, College of Biotechnology,  
Tianjin University of Science and Technology,  
Tianjin 300457, China; zsjtust@163.com (S.Z.); huisun26@163.com (H.S.);  
hhuangzhiqi@163.com (Z.H.); zxhan419@163.com (Z.H.); houjiayi0618@126.com  
(J.H.); lfp@tust.edu.cn (F.L.)

\* Correspondence: lyh@tust.edu.cn

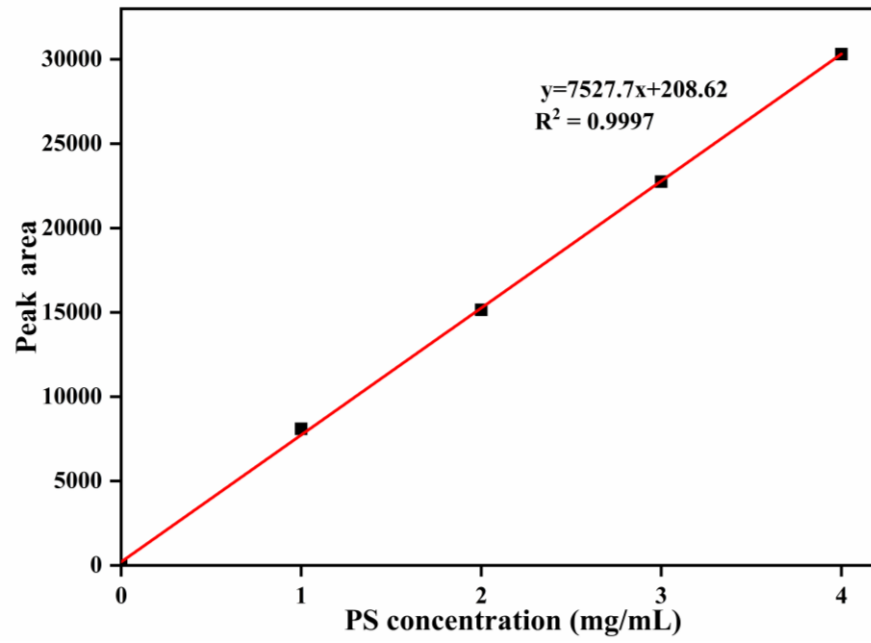

**Figure S1.** HPLC standard curve of PS concentration .

**Table S1.** The influence of enzyme content and Ca<sup>2+</sup> concentration on the relative enzyme activity and the enzyme activity recovery rate.

| Enzyme content of<br>free saPLD<br>(U)/Ca <sup>2+</sup><br>concentration<br>(mM) | Molecular mass of<br>PS (mg) | Enzyme content of<br>saPLD@NFs (U) | Relative enzyme<br>activity of<br>saPLD@NFs (%) | The enzyme<br>activity recovery<br>rate of saPLD@NFs<br>(%) |
|----------------------------------------------------------------------------------|------------------------------|------------------------------------|-------------------------------------------------|-------------------------------------------------------------|
| 0.15/12                                                                          | 1.460±0.140                  | 0.098±0.003                        | 18.367±0.717                                    | 65.610±1.686                                                |
| 0.15/24                                                                          | 1.619±0.034                  | 0.109±0.002                        | 20.369±0.702                                    | 72.750±1.531                                                |
| 0.15/36                                                                          | 2.103±0.039                  | 0.142±0.003                        | 26.459±0.842                                    | 94.511±1.732                                                |
| 0.15/48                                                                          | 2.003±0.031                  | 0.135±0.002                        | 25.202±0.731                                    | 90.016±1.395                                                |
| 0.30/12                                                                          | 3.665±0.070                  | 0.247±0.005                        | 46.098±1.403                                    | 82.320±1.579                                                |
| 0.30/24                                                                          | 4.720±0.062                  | 0.318±0.004                        | 59.437±1.583                                    | 106.140±1.402                                               |
| 0.30/36                                                                          | 5.261±0.073                  | 0.355±0.005                        | 66.168±1.808                                    | 118.162±1.638                                               |
| 0.30/48                                                                          | 4.850±0.081                  | 0.327±0.005                        | 61.016±1.138                                    | 108.951±1.829                                               |
| 0.45/12                                                                          | 6.050±0.064                  | 0.408±0.004                        | 76.102±1.830                                    | 90.603±0.957                                                |
| 0.45/24                                                                          | 7.543±0.036                  | 0.508±0.002                        | 94.884±1.730                                    | 112.961±0.539                                               |
| 0.45/36                                                                          | 7.950±0.107                  | 0.536±0.007                        | 100.000±0.000                                   | 119.053±1.603                                               |
| 0.45/48                                                                          | 7.443±0.050                  | 0.501±0.003                        | 94.884±1.890                                    | 111.451±0.749                                               |
| 0.60/12                                                                          | 5.815±0.098                  | 0.391±0.007                        | 73.134±2.215                                    | 65.311±1.089                                                |
| 0.60/24                                                                          | 6.801±0.134                  | 0.458±0.009                        | 85.543±0.520                                    | 76.382±1.502                                                |
| 0.60/36                                                                          | 7.439±0.158                  | 0.501±0.011                        | 93.574±0.724                                    | 83.551±1.771                                                |
| 0.60/48                                                                          | 7.059±0.160                  | 0.476±0.011                        | 88.791±0.823                                    | 79.281±1.801                                                |
| 0.75/12                                                                          | 5.710±0.178                  | 0.385±0.012                        | 71.818±1.275                                    | 51.311±1.611                                                |
| 0.75/24                                                                          | 6.737±0.171                  | 0.454±0.012                        | 84.740±1.017                                    | 60.530±1.540                                                |
| 0.75/36                                                                          | 6.737±1.168                  | 0.484±0.011                        | 90.256±0.901                                    | 64.471±1.511                                                |
| 0.75/48                                                                          | 6.737±0.183                  | 0.470±0.012                        | 87.68±0±1.118                                   | 62.637±1.647                                                |

The peak areas were utilized to calculate the PS concentrations in the samples using standard curves prepared by the PS standards of known concentration, and the molecular mass of PS could be further determined. One unit of saPLD@NFs or free saPLD was defined as the amount of enzyme generating 1 µmol of PS from PC per min. The relative enzyme activity was the percentage of enzyme activity to the maximal enzyme activity, and the enzyme activity recovery rate of saPLD@NFs was designated as the observed total activity of immobilized enzymes divided by the total original activity.

**Table S2.** Influence of temperature on the activity of saPLD@NFs and free saPLD.

| Temperature<br>(°C) | Molecular mass of PS (mg) |             | Enzyme content of<br>saPLD@NFs (U) |             | Relative enzyme activity<br>(%) |              |
|---------------------|---------------------------|-------------|------------------------------------|-------------|---------------------------------|--------------|
|                     | saPLD@NFs                 | free saPLD  | saPLD@NFs                          | free saPLD  | saPLD@NFs                       | free saPLD   |
| 30                  | 5.203±0.140               | 3.741±0.195 | 0.352±0.009                        | 0.253±0.013 | 65.63±1.433                     | 56.16±1.475  |
| 40                  | 6.112±0.125               | 4.535±0.199 | 0.413±0.008                        | 0.306±0.013 | 77.08±1.183                     | 68.00±1.210  |
| 50                  | 7.598±0.140               | 5.921±0.250 | 0.513±0.009                        | 0.400±0.017 | 95.83±1.283                     | 88.90±1.420  |
| 60                  | 7.929±0.040               | 6.660±0.178 | 0.536±0.004                        | 0.450±0.012 | 100.00±0.000                    | 100.00±0.000 |
| 70                  | 6.194±0.145               | 2.711±0.152 | 0.419±0.010                        | 0.183±0.010 | 78.13±1.435                     | 40.60±1.223  |
| 80                  | 4.955±0.146               | 1.938±0.124 | 0.335±0.011                        | 0.131±0.008 | 62.50±1.520                     | 29.10±1.113  |

The peak areas were utilized to calculate the PS concentrations in the samples using standard curves prepared by the PS standards of known concentration, and the molecular mass of PS could be further determined. Then the enzyme activities of free and saPLD@NFs were calculated based on the definition of enzyme activity. The relative enzyme activity was the percentage of enzyme activity to the maximal enzyme activity.

**Table S3.** Influence of temperature on the stability of saPLD@NFs and free saPLD.

| Temperature<br>(°C) | Molecular mass of PS (mg) |             | Enzyme content of<br>saPLD@NFs (U) |             | Residual enzyme activity<br>(%) |               |
|---------------------|---------------------------|-------------|------------------------------------|-------------|---------------------------------|---------------|
|                     | saPLD@NFs                 | free saPLD  | saPLD@NFs                          | free saPLD  | saPLD@NFs                       | free saPLD    |
| 30                  | 8.250±0.136               | 6.727±0.086 | 0.557±0.009                        | 0.455±0.006 | 104.000±1.720                   | 101.000±1.290 |
| 40                  | 7.845±0.098               | 4.834±0.100 | 0.530±0.007                        | 0.327±0.007 | 98.899±1.229                    | 72.587±1.497  |
| 50                  | 4.735±0.134               | 0.366±0.109 | 0.320±0.009                        | 0.025±0.007 | 59.684±1.694                    | 5.500±1.630   |
| 60                  | 2.502±0.103               | 0.087±0.081 | 0.169±0.007                        | 0.006±0.005 | 31.542±1.302                    | 1.300±1.210   |

The peak areas were utilized to calculate the PS concentrations in the samples using standard curves prepared by the PS standards of known concentration, and the molecular mass of PS could be further determined. Then the enzyme activities of free and saPLD@NFs were calculated based on the definition of enzyme activity. The residual enzyme activity was designated the viability of the untreated enzyme as 100%.

**Table S4.** Influence of pH on the activity of saPLD@NFs and free saPLD..

| pH  | Molecular mass of PS (mg) |             | Enzyme content of saPLD@NFs (U) |             | Relative enzyme activity (%) |               |
|-----|---------------------------|-------------|---------------------------------|-------------|------------------------------|---------------|
|     | saPLD@NFs                 | free saPLD  | saPLD@NFs                       | free saPLD  | saPLD@NFs                    | free saPLD    |
| 5.0 | 7.539±0.183               | 5.135±0.208 | 0.509±0.012                     | 0.347±0.014 | 95.036±1.416                 | 77.112±1.442  |
| 6.0 | 7.933±0.074               | 6.660±0.148 | 0.536±0.005                     | 0.450±0.010 | 100.000±0.000                | 100.000±0.000 |
| 7.0 | 7.021±0.187               | 5.395±0.198 | 0.474±0.013                     | 0.365±0.013 | 88.508±1.528                 | 81.021±1.201  |
| 8.0 | 5.322±0.153               | 3.297±0.189 | 0.360±0.010                     | 0.223±0.013 | 67.094±1.304                 | 49.500±1.740  |
| 9.0 | 4.509±0.138               | 2.688±0.169 | 0.305±0.009                     | 0.182±0.011 | 56.845±1.215                 | 40.353±1.643  |

The peak areas were utilized to calculate the PS concentrations in the samples using standard curves prepared by the PS standards of known concentration, and the molecular mass of PS could be further determined. Then the enzyme activities of free and saPLD@NFs were calculated based on the definition of enzyme activity. The relative enzyme activity was the percentage of enzyme activity to the maximal enzyme activity.

**Table S5.** Influence of pH on the stability of saPLD@NFs and free saPLD.

| pH  | Molecular mass of PS (mg) |             | Enzyme content of saPLD@NFs (U) |             | Residual enzyme activity (%) |              |
|-----|---------------------------|-------------|---------------------------------|-------------|------------------------------|--------------|
|     | saPLD@NFs                 | free saPLD  | saPLD@NFs                       | free saPLD  | saPLD@NFs                    | free saPLD   |
| 5.0 | 7.485±0.113               | 5.774±0.087 | 0.506±0.008                     | 0.390±0.006 | 94.411±1.421                 | 86.700±1.310 |
| 6.0 | 7.897±0.103               | 6.106±0.114 | 0.534±0.007                     | 0.413±0.008 | 99.601±1.301                 | 91.675±1.715 |
| 7.0 | 7.534±0.160               | 5.845±0.088 | 0.509±0.011                     | 0.395±0.006 | 95.023±2.023                 | 87.766±1.316 |
| 8.0 | 6.826±0.104               | 5.440±0.100 | 0.461±0.007                     | 0.368±0.007 | 86.098±1.318                 | 81.688±1.508 |

The peak areas were utilized to calculate the PS concentrations in the samples using standard curves prepared by the PS standards of known concentration, and the molecular mass of PS could be further determined. Then the enzyme activities of free and saPLD@NFs were calculated based on the definition of enzyme activity. The residual enzyme activity was designated the viability of the untreated enzyme as 100%.

**Table S6.** Enzymatic catalysis with different reaction times and enzyme amount.

| saPLD@NFs amount<br>(g)/Reaction time (h) | Molecular mass of PS (mg) | PS yield of saPLD@NFs<br>(%) |
|-------------------------------------------|---------------------------|------------------------------|
| 0.25/1                                    | 9.335±0.768               | 19.124±1.579                 |
| 0.25/2                                    | 14.302±0.771              | 29.300±1.580                 |
| 0.25/3                                    | 18.624±0.841              | 38.153±1.723                 |
| 0.25/4                                    | 19.037±0.703              | 39.000±1.440                 |
| 0.25/5                                    | 20.784±0.780              | 42.579±1.599                 |
| 0.50/1                                    | 19.345±0.703              | 39.630±1.440                 |
| 0.50/2                                    | 23.284±0.727              | 47.700±1.490                 |
| 0.50/3                                    | 28.032±0.700              | 57.428±1.578                 |
| 0.50/4                                    | 27.872±0.903              | 57.100±1.850                 |
| 0.50/5                                    | 27.639±0.743              | 56.623±1.503                 |
| 0.75/1                                    | 20.480±0.682              | 41.957±1.397                 |
| 0.75/2                                    | 23.918±0.639              | 49.000±1.310                 |
| 0.75/3                                    | 27.912±0.762              | 57.183±1.543                 |
| 0.75/4                                    | 28.263±0.789              | 57.900±1.615                 |
| 0.75/5                                    | 27.847±0.717              | 57.050±1.470                 |

The peak areas were utilized to calculate the PS concentrations in the samples using standard curves prepared by the PS standards of known concentration, and the molecular mass of PS could be further determined. The PS conversion rate (mol%) was exhibited as the PS yield, which was calculated by the equation: PS yield (mol%)=PS amount/initial PC amount×100%.
